# Supplementary material for: LiF-doped sulfide solid electrolytes with a stabilized α-Li3PS4 analog phase for all-solid-state Li metal batteries
Source: Royal Society of Chemistry journal article supplement (doi:10.1039/d4ta06831a), 2024-12-05
Supplement: d4ta06831a1.pdf [file d4ta06831a1.pdf]

## Supporting information

### **LiF-Doped Sulfide Solid Electrolytes with Stabilized $\alpha$ -Li<sub>3</sub>PS<sub>4</sub> Analog Phase for All-Solid-State Li Metal Batteries**

Taichi Asakura, Ryo Izawa, Takuya Kimura, Chie Hotehama,  
Hiroe Kowada, Minako Deguchi, Kota Motohashi, Atsushi Sakuda,  
Masahiro Tatsumisago, Akitoshi Hayashi\*

Department of Applied Chemistry, Graduate School of Engineering,  
Osaka Metropolitan University,  
1-1 Gakuen-cho, Naka-ku, Sakai, Osaka 599-8531, Japan

\*Corresponding Author: [akitoshihayashi@omu.ac.jp](mailto:akitoshihayashi@omu.ac.jp)

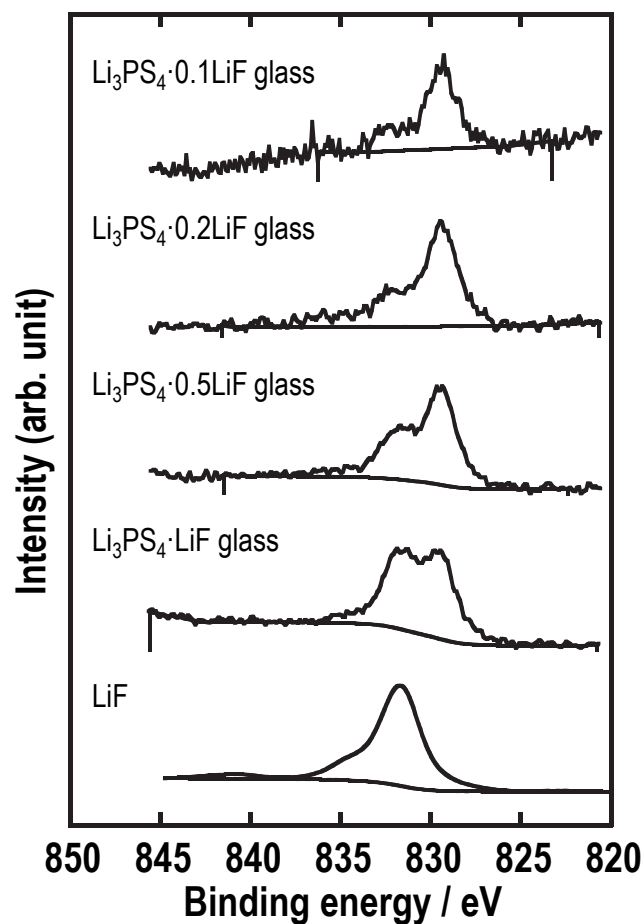

Figure S1 F KLL XPS spectra of  $\text{Li}_3\text{PS}_4 \cdot x\text{LiF}$  glasses.

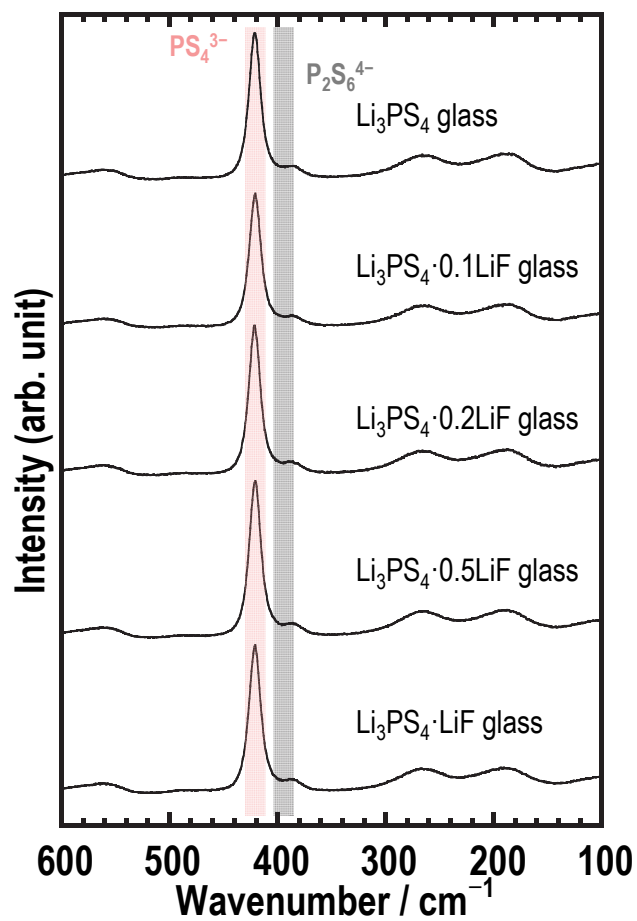

Figure S2 Raman spectra of  $\text{Li}_3\text{PS}_4 \cdot x\text{LiF}$  glasses.

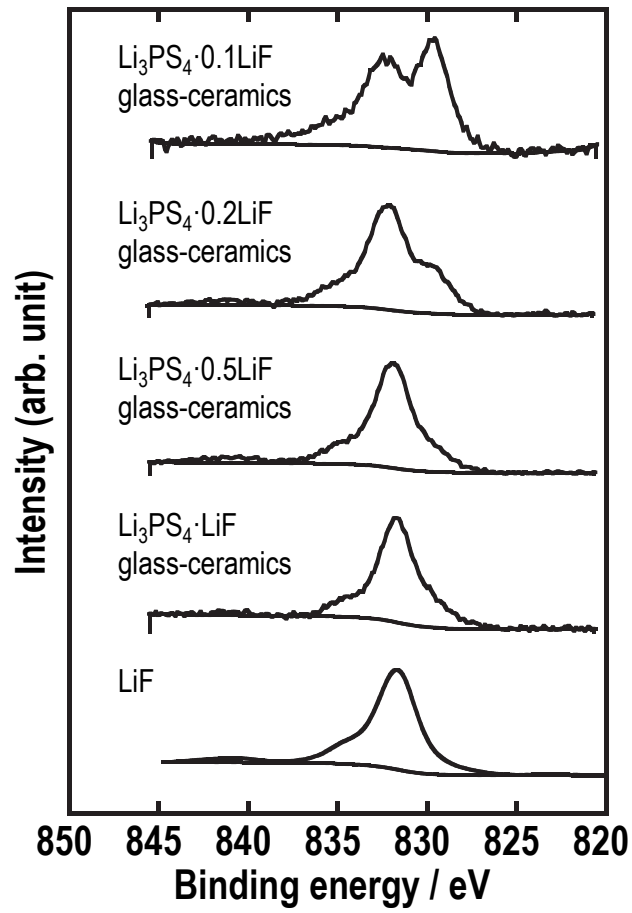

**Figure S3** F KLL XPS spectra of  $\text{Li}_3\text{PS}_4 \cdot x\text{LiF}$  glass-ceramic samples.

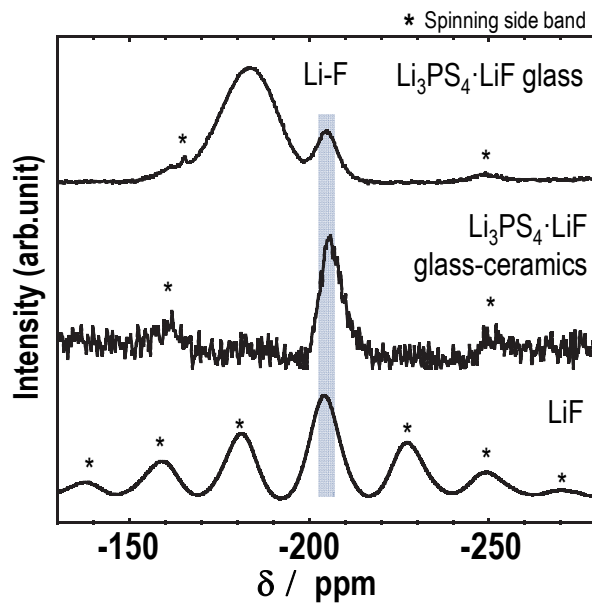

**Figure S4**  $^{19}\text{F}$  MAS-NMR spectra of  $\text{Li}_3\text{PS}_4 \cdot \text{LiF}$  glass and glass-ceramic samples.

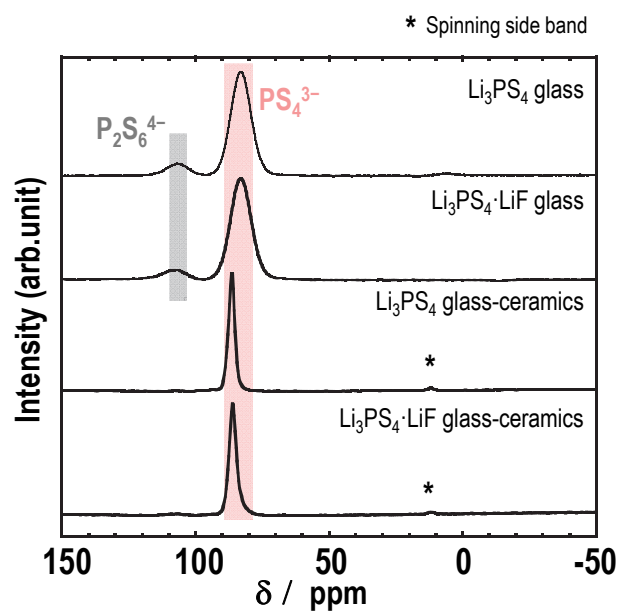

**Figure S5**  $^{31}\text{P}$  MAS- NMR spectra of  $\text{Li}_3\text{PS}_4 \cdot \text{LiF}$  glass and glass-ceramic samples.

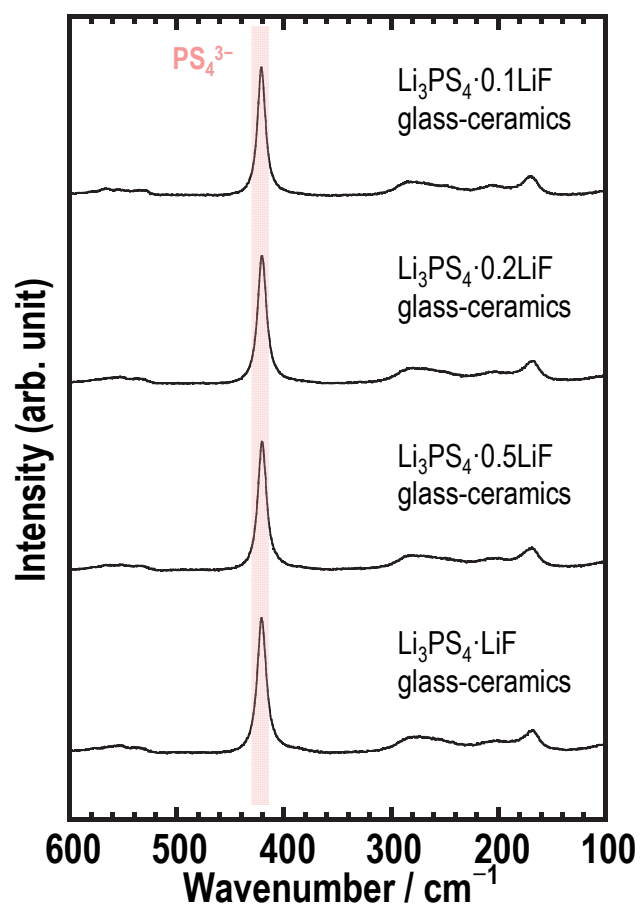

**Figure S6** Raman spectra of  $\text{Li}_3\text{PS}_4 \cdot x\text{LiF}$  glass-ceramics samples.

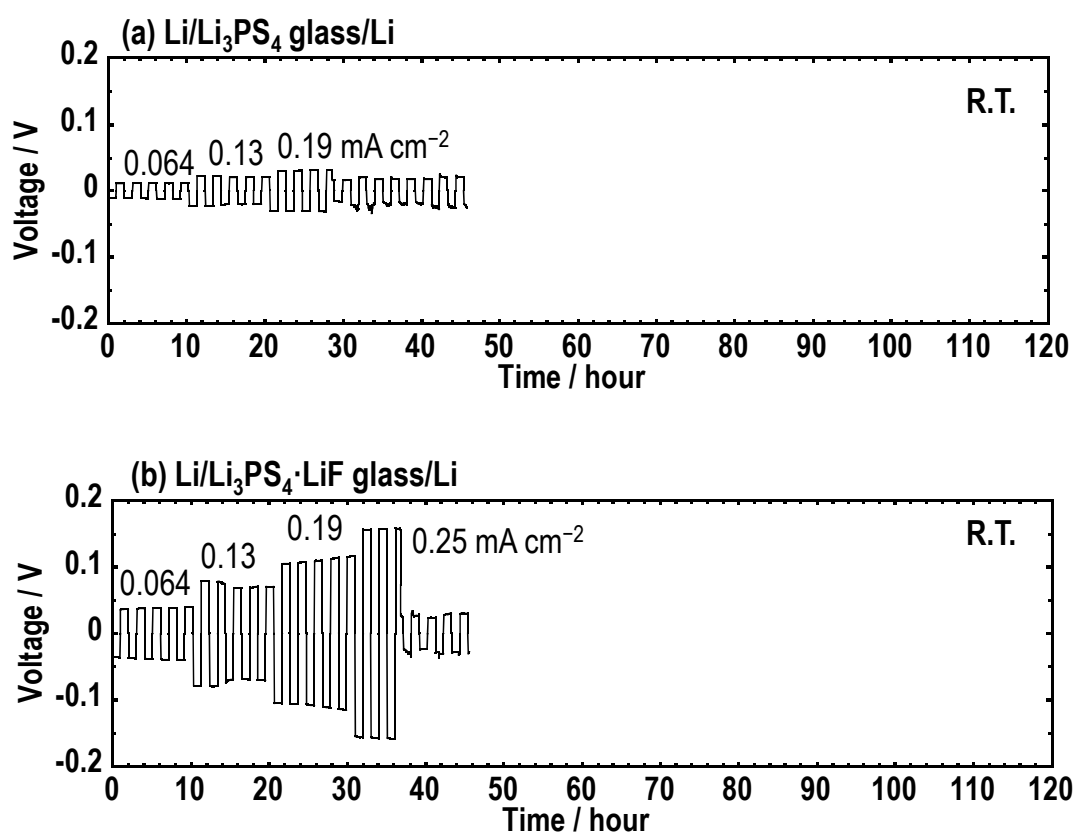

**Figure S7** Galvanostatic cycling tests of (a)  $\text{Li}/\text{Li}_3\text{PS}_4$  glass/ $\text{Li}$  and (b)  $\text{Li}/\text{Li}_3\text{PS}_4 \cdot \text{LiF}$  glass/ $\text{Li}$  cells at room temperature. The applied current densities are shown in the figure.

**Table S1** The result of intensity decomposition for XRD pattern of  $\text{Li}_3\text{PS}_4$  glass-ceramic sample.

|                                          |                         |                   |                                                                                                   |                                      |
|------------------------------------------|-------------------------|-------------------|---------------------------------------------------------------------------------------------------|--------------------------------------|
| Crystal system                           | Orthorhombic            | Lattice parameter | $a = 12.457 (3) / \text{\AA}$<br>$b = 8.2968 (15) / \text{\AA}$<br>$c = 6.1439 (10) / \text{\AA}$ | $\alpha = \beta = \gamma = 90^\circ$ |
| Space group                              | <i>Pnma</i><br>(No. 62) | Volume            | $V = 635.014 / \text{\AA}^3$                                                                      | $Z = 4$                              |
| $R_{\text{wp}} = 4.63 \%$ , $S = 2.1775$ |                         |                   |                                                                                                   |                                      |

**Table S2** The result of intensity decomposition for XRD pattern of  $\text{Li}_3\text{PS}_4 \cdot \text{LiF}$  glass-ceramic sample.

|                                          |                         |                   |                                                                                                   |                                      |
|------------------------------------------|-------------------------|-------------------|---------------------------------------------------------------------------------------------------|--------------------------------------|
| Crystal system                           | Orthorhombic            | Lattice parameter | $a = 12.486 (4) / \text{\AA}$<br>$b = 8.2710 (15) / \text{\AA}$<br>$c = 6.1414 (10) / \text{\AA}$ | $\alpha = \beta = \gamma = 90^\circ$ |
| Space group                              | <i>Pnma</i><br>(No. 62) | Volume            | $V = 635.997 / \text{\AA}^3$                                                                      | $Z = 4$                              |
| $R_{\text{wp}} = 3.58 \%$ , $S = 1.6435$ |                         |                   |                                                                                                   |                                      |
